# Supplementary material for: The modified Thomas test is not a valid measure of hip extension unless pelvic tilt is controlled
Source: PeerJ. 2016 Aug 11;4:e2325. doi: 10.7717/peerj.2325 (PMC4991856; doi:10.7717/peerj.2325)
Supplement: Supplemental Information 1 [file peerj-04-2325-s001.xlsx]

## Sheet: Sheet1
ID	Sex	Age	Height	Mass	Waist	Thigh	MTT	Pelvic Tilt	TRUE
1	F	20	157.5	53.5	73	54	19.4	20	-1.06667
2	F	19	167.6	56.7	65	53.5	9.46667	4	5.33333
3	M	22	177.8	97.5	95	65.5	-2.86667	0.666667	-3.46667
4	F	18	157.5	44.5	64	48.5	8.5	10	2.66667
5	M	18	182.9	70.3	76	58	5.03333	0.666667	4.03333
6	F	26	170.2	76.7	104	61.5	-4.46667	2.33333	-5.3
7	F	20	172.7	68.9	77.5	66	8.86667	5	3.63333
8	M	21	175.3	74.8	77	55	14.7	-4.66667	20.4667
9	M	20	175.3	81.6	84.5	62	-10.1333	-6.66667	-4.53333
10	F	21	170.2	68	82.5	52	2.3	4	-0.633333
11	M	22	180.3	81.6	96	61	-15.4	-23.6667	17.0333
12	M	23	172.2	77.1	85	58.5	1.06667	6.66667	-5.46667
13	F	21	170.2	63.5	81	62	-5.66667	-0.666667	-4.53333
14	M	21	193	99.8	97.5	65	12.3333	13.3333	-3.13333
15	F	20	165.1	49.9	67	51	11	-4	16.3333
16	F	23	170.2	61.2			1	-9.33333	10.8
17	F	26	167.6	63.5			-1.03333	-3	2.7
18	F	21	152.4	44.5	70.5	50	12.9333	3	10.2
19	F	21	170.2	62.4	69	56	7.1	-1	8.9
20	F	21	175.3	65.8	69	59	6	-6	12.1333
21	F	21	162.6	52.2	67.5	49.5	15.7	4.33333	9.2
22	F	21	157.5	60.3	81	57	6.93333	2	5.2
23	F	34	165	83	99	70	-10.2	-8.33333	-3.56667
24	M	20	185.4	83.9	84	61	2.06667	-9	12.1333
25	M	21	177.8	99.8	103	70	-19.1667	2.33333	-21.1333
26	F	19	165.1	59.1	69	55	-6.43333	-17	11.3
27	M	22	175.2	88	91	65.5	-10.8667	-1	-10.7
28	M	34	177.8	83.9	91	61	3.53333	3.33333	0.3
29	F	21	160	59	77	56	18.4333	3.66667	12.9333
